# Supplementary material for: N-Myc-Interacting Protein Negatively Regulates TNF-α-Induced NF-κB Transcriptional Activity by Sequestering NF-κB/p65 in the Cytoplasm
Source: PubMed Central journal article supplement (PMC5674077; doi:10.1038/s41598-017-15074-5), 2017-11-06
Supplement: 41598_2017_15074_MOESM1_ESM.pdf [file 41598_2017_15074_MOESM1_ESM.pdf]

**N-Myc-Interacting Protein Negatively Regulates TNF- $\alpha$ -Induced NF- $\kappa$ B  
Transcriptional Activity by Sequestering NF- $\kappa$ B/p65 in the Cytoplasm**

Jingjing Hou<sup>1,2,3</sup>, Shihao Jiang<sup>1</sup>, Jiabao Zhao<sup>1</sup>, Dong Zhu<sup>1</sup>, Xinmeng Zhao<sup>1</sup>, Jian-chun  
Cai<sup>2,3</sup> and Si Qing Zhang<sup>1,\*</sup>

<sup>1</sup>State Key Laboratory of Cellular Stress Biology and School of Life Sciences,  
Xiamen University, Xiamen, Fujian 361102, China; <sup>2</sup>Institute of Gastrointestinal  
Oncology, Medical College of Xiamen University, Xiamen, Fujian 361004, China;  
and <sup>3</sup>Department of Gastrointestinal Surgery, Zhongshan Hospital of Xiamen  
University, Xiamen, Fujian 361004, China

\*Correspondence and requests for materials should be addressed to Si Qing Zhang  
(email: zhangsq@xmu.edu.cn).

# Supplementary Figure 1

**A**

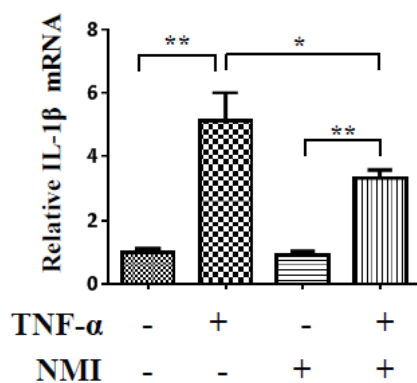

**B**

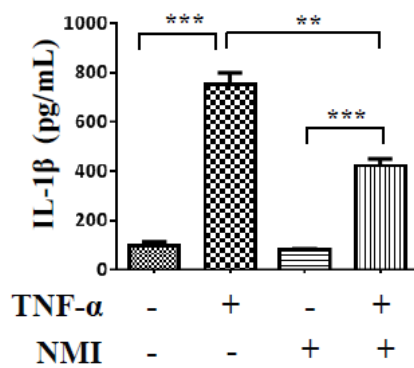

**C**

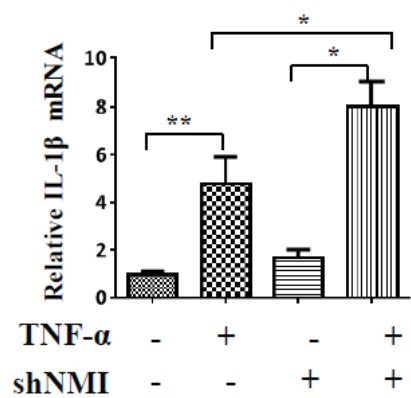

**D**

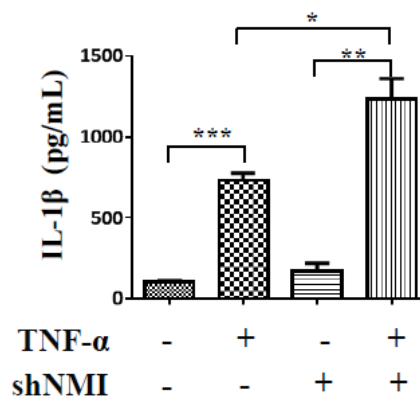

## Supplementary Figure 2

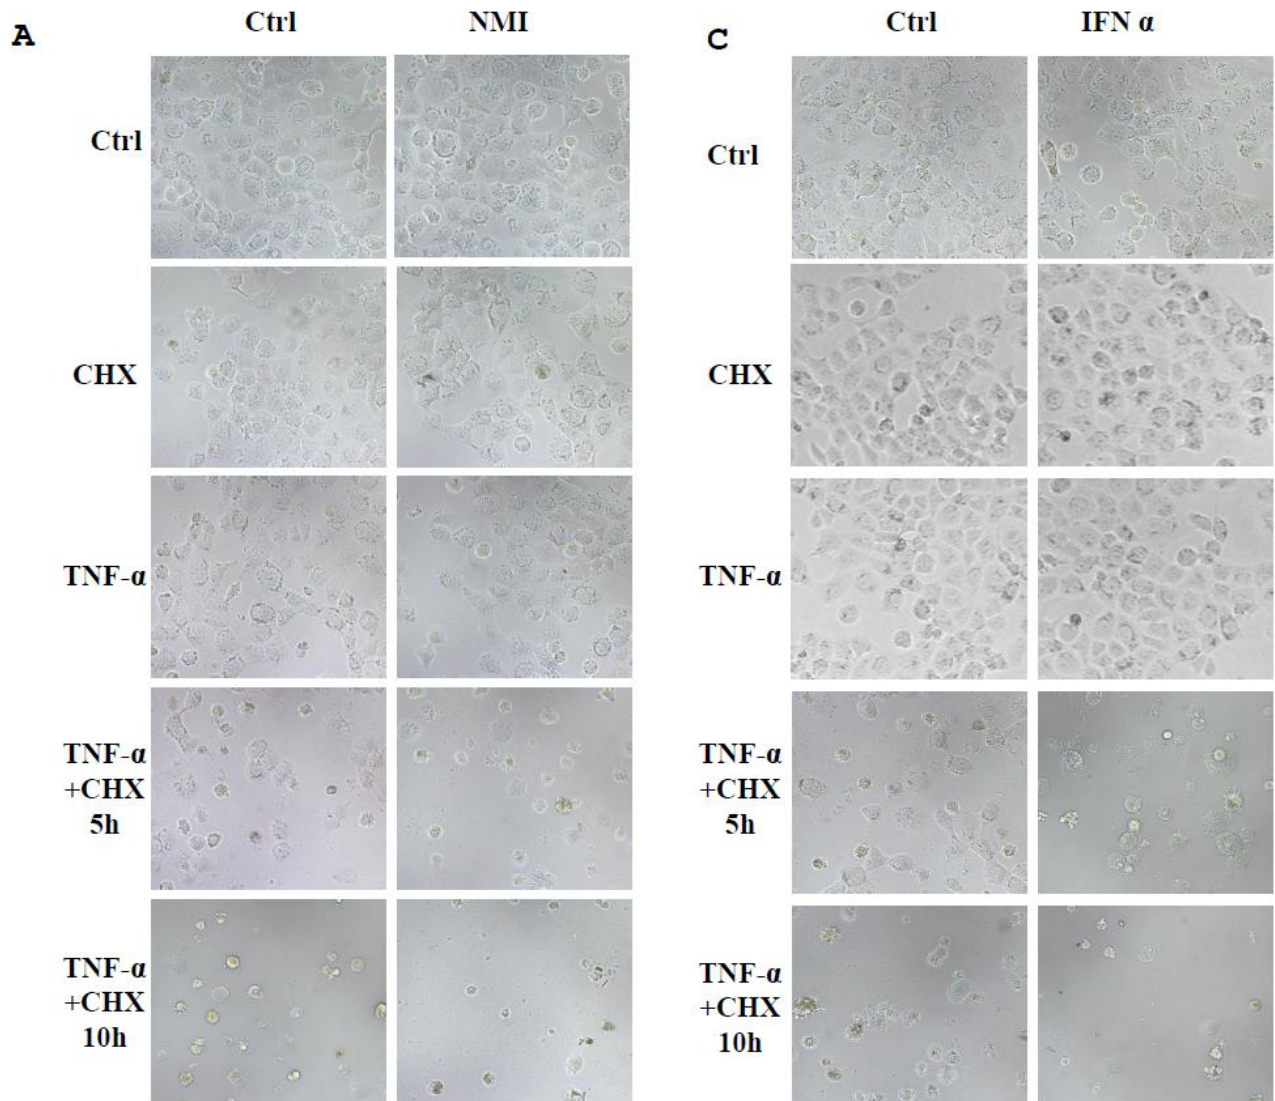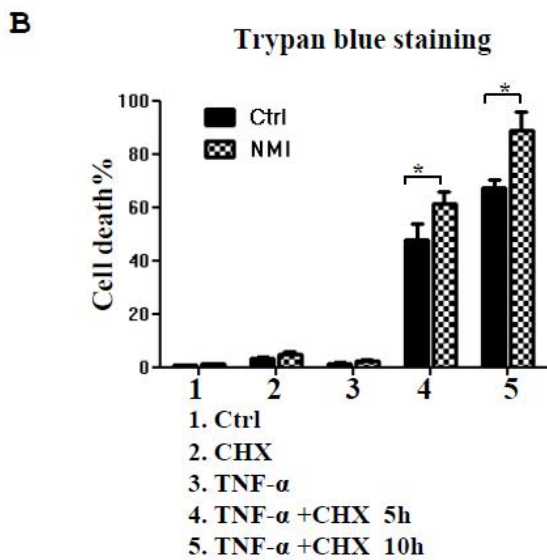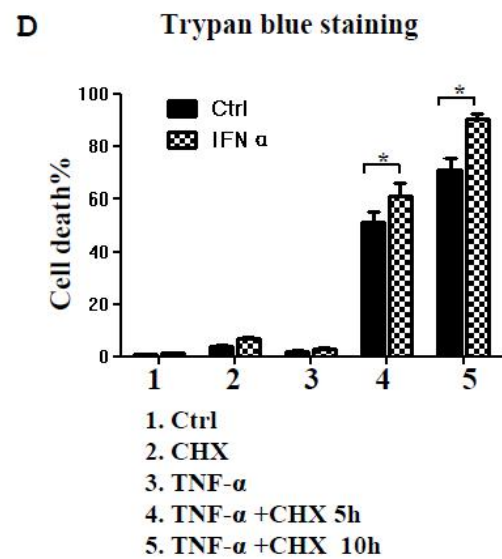

### Supplementary Figure 3

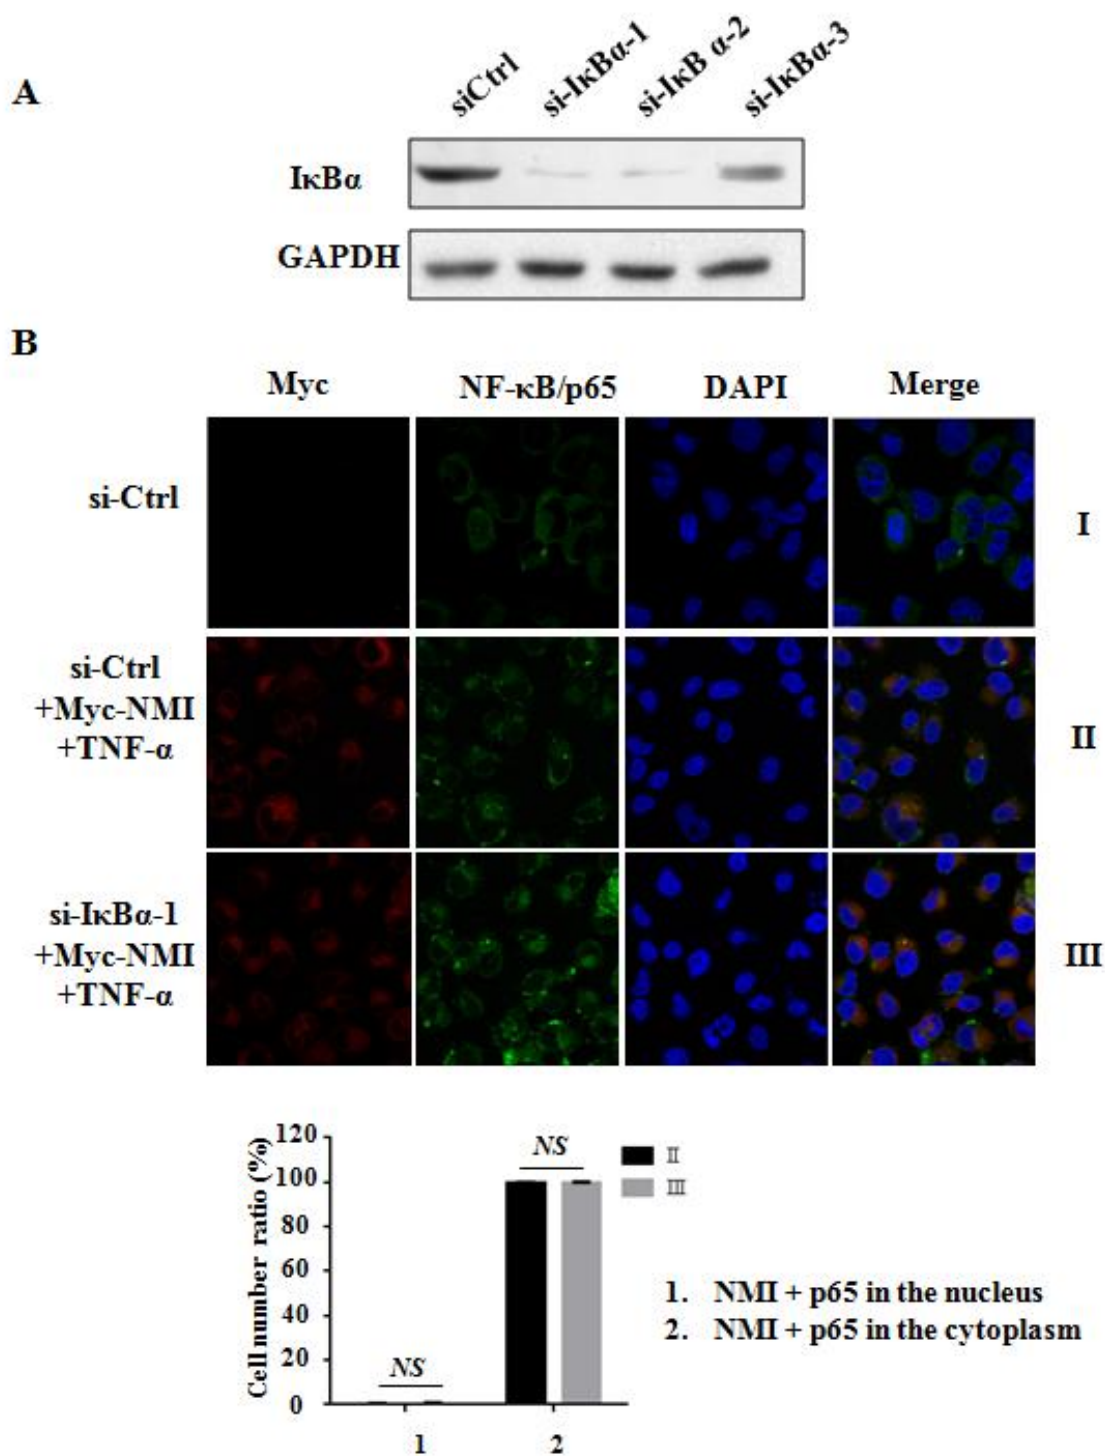

## Supplementary Figure 4

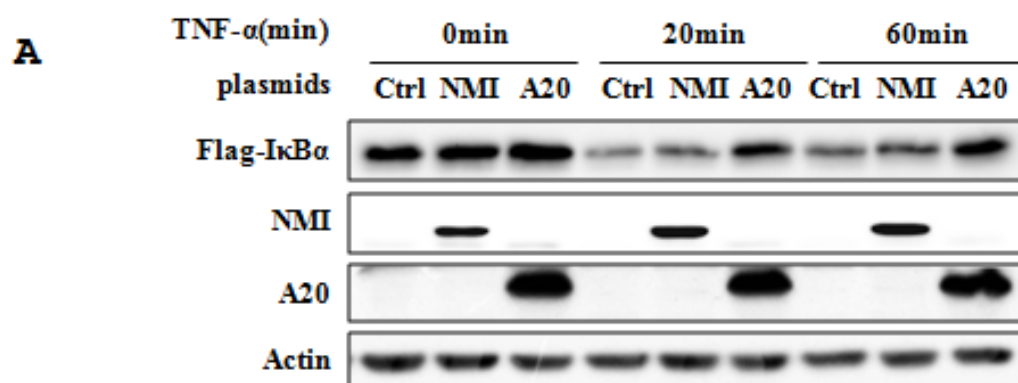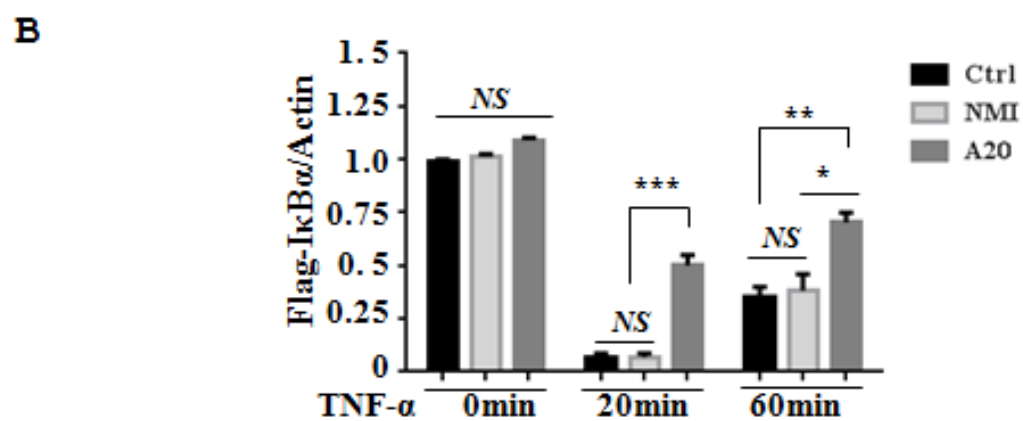

## Supplementary Figure Legends

### Supplementary Figure 1. NMI negatively regulates TNF- $\alpha$ -induced IL-1 $\beta$

**production.** (A) HeLa cells were transfected with control or NMI-expression plasmids, the cells were left untreated or treated with TNF- $\alpha$  (10 ng/ml) for an additional 2 h. The total RNA samples isolated from these cells were subjected to qPCR analysis using IL-1 $\beta$ , NMI, or GAPDH primers. (B) HeLa cells were transfected with control or NMI-expression plasmids, and the cells were left untreated or treated with TNF- $\alpha$  (10 ng/ml) for an additional 12 h. The IL-1 $\beta$  levels in the cell culture supernatants were assayed by ELISA. Results are representative of three independent experiments, and the error bars represent the SD. \* $p < 0.05$ , \*\*\* $p < 0.001$ . (C) HeLa shCtrl or HeLa shNMI cells were left untreated or treated with TNF- $\alpha$  (10 ng/ml) for an additional 2 h. The total RNA samples isolated from these cells were subjected to qPCR analysis using IL-1 $\beta$ , NMI, or GAPDH primers. (D) HeLa-shCtrl and HeLa-shNMI cell lines were left untreated or treated with TNF- $\alpha$  (10 ng/ml) for an additional 12 h. The IL-6 levels in the cell culture supernatants were assayed by ELISA. Results are representative of three independent experiments, and the error bars represent the SD. \* $p < 0.05$ , \*\* $p < 0.01$ , \*\*\* $p < 0.001$ .

### Supplementary Figure 2. NMI enhances TNF- $\alpha$ plus CHX induced H1299 cell apoptosis.

(A) The NMI-overexpressing H1299 cells (H1299-NMI) show an increased apoptotic morphology after treatment with TNF- $\alpha$  plus CHX compared with the control cells

(H1299-Ctrl). H1299-Ctrl and H1299-NMI cells were plated in 12-well dishes. The following day, the cells were treated as indicated (TNF- $\alpha$ : 5 ng/ml, CHX: 5  $\mu$ g/ml) for 5 h or 10 h, and the cells images were then taken with a Nikon-TE2000 microscope. (B) The cell death in (A) was quantified by a Trypan blue staining assay. The data are the mean  $\pm$  S.D. of three independent experiments. \* $p < 0.05$ . (C) IFN $\alpha$  increases the apoptosis induced by TNF- $\alpha$  plus CHX in H1299 cells. H1299 cells were plated in 12-well plates, and the next day the cells were untreated or treated with IFN $\alpha$  for 12 h and then treated with TNF- $\alpha$  plus CHX for the indicated times (TNF- $\alpha$ : 5 ng/ml, CHX: 5  $\mu$ g/ml). (D) The ratio of cell death in (C) was determined by a Trypan blue staining assay. The results are representative of three independent experiments, and the error bars represent the SD.\* $p < 0.05$ .

**Supplementary Figure 3.** HeLa cells were transfected with si-Ctrl or si-I $\kappa$ B $\alpha$ , 48h posttransfection, cells were transfected with Myc-NMI plasmid, and 24 h later, the cells were left untreated or treated with TNF- $\alpha$  (10 ng/ml) for 60 min. The cells were fixed and stained with anti-p65 or anti-Myc Abs and then with rhodamine-conjugated anti-mouse IgG (red) or FITC-conjugated anti-rabbit Abs (green). The same slide was also stained with DAPI for nuclear staining. Then, the expression and localization of p65 and Myc-NMI were determined by confocal immunofluorescence analysis. The percentage of the cells expressing p65 in the nucleus or cytoplasm among the cells that infected with si-Ctrl or si-I $\kappa$ B $\alpha$  was calculated in the bottom panel. *NS*, not significant.

**Supplementary Figure 4.** (A) HeLa cells were transfected with the FLAG- I $\kappa$ B $\alpha$  and control, Myc-NMI or A20 plasmids. At 24 h posttransfection, the cells were treated with TNF- $\alpha$  (10 ng/ml) for the indicated periods. The cell lysates were immunoblotted with the indicated Abs. (B) The quantification by densitometry of western blots of FLAG- I $\kappa$ B $\alpha$  bands was shown. Actin was used as the internal control. The results are representative of three independent experiments, and the error bars represent the SD.

\*p < 0.05, \*\*p < 0.01, \*\*\*p < 0.001.
